# Supplementary material
Source: PubMed Central journal article supplement (PMC9487296)
Supplement: Suppl_data.pdf [file Suppl_data.pdf]

## **Appendix**

### **Definitions and differential diagnoses**

#### **Asthma**

Asthma (as defined by the Global Initiative for Asthma, GINA) is a chronic inflammatory disorder of the airways in which many cells and cellular elements play a role [1]. The chronic inflammation increases airway responsiveness, which leads to recurrent episodes of wheezing, breathlessness, chest tightness and coughing, particularly at night or in the early morning. These episodes are usually associated with widespread variable airflow obstruction that is reversible either spontaneously or with treatment.

Asthma arising from immunological reactions is called allergic asthma [2, 3]. Typically, this condition has a latency period, and the immunological mechanism has been identified for most high- and for some low-molecular weight (LMW) agents, i.e. anhydrides, isocyanates. These particular cases are initiated by IgE antibodies (IgE-mediated asthma). The relevance of immunological mechanisms in the absence of IgE-sensitization is not proven and needs further investigation.

The mechanisms initiating irritant-induced (non-allergic) asthma (whether with or without a latency period) are not well defined although similar inflammatory changes do occur. For details, see below.

#### **Work-related asthma (WRA)**

WRA comprises occupational as well as work-aggravated asthma [4]. The pathophysiological mechanisms of OA do not differ from non-OA and it can also be separated into subdivisions following the same principle.

From the diagnostic point of view, it is important to divide OA into three subgroups:

- Allergic (IgE-mediated) OA. These cases comprise in most countries the majority of OA disorders and IgE antibodies are detectable that are specific for the causative occupational agent as indicated by an immediate-type skin-prick test. Examples include flour, animal proteins, molds, enzymes, latex, as well as some LMW agents (anhydrides, isocyanates) that elicit such responses in some individuals.
- OA due to unknown pathomechanisms. This includes OA due to wood dust, platinum and often isocyanates. IgE antibodies are not detectable even if there is a latent period, i.e. an asymptomatic period of exposure before the development of asthma until impairments occur.

- Irritant-induced OA. This disorder is caused by non-specific irritant or even toxic effects on the airways.

One subcategory of irritant-induced asthma is observed at high concentrations causing the disorder in most or even all occupationally exposed subjects. This is Reactive Airways Dysfunction Syndrome (RADS), now usually called acute irritant-induced asthma, which results typically from a single spill of chlorine, glutaraldehyde, isocyanates, ammonia, formaldehyde, acrylates or extremely high levels of dust or smoke (Table 2). Affected individuals have no pre-existing asthma, and asthma starts within 24 hours of the exposure together with increased non-specific hyperresponsiveness, persisting for at least three months after the incident. There is no latent interval, and those affected are not affected by usual low-dose exposure to the causative agent. If the exposure was at work, subsequent employment is not usually threatened (provided endangering exposures are excluded).

A further subcategory of Not so sudden irritant-induced asthma is due to lower concentrations of irritants, mostly in their occupational exposure limit (OEL) or permissible exposure limit (PEL) ranges. Exposures are less intense than in acute irritant-induced asthma. There is evidence for an excess of atopy and those with childhood asthma in this group.

Those affected are not affected by usual low-dose exposure to the causative agent.

There is evidence for a third subcategory of irritant asthma, Low-dose irritant-induced asthma, which obviously has been overlooked for long time, although repeatedly reported [5, 6]. There is chronic or repeated exposure to a single irritant or mixture of irritants frequently below its/their OEL(s)/PEL(s) but no high-level exposure and asthma develops after a symptomless latent interval which may be several years. Once asthma has developed usual exposures result in asthma, similar to OA with sensitization. This is clinically indistinguishable from allergic OA in terms of pre-existing asthma, latency, atopy, smoking, NSBHR and the PEF responses to usual level exposure. Low-dose irritant-induced asthma was described in swine confinement facilities, comprising endotoxins [7, 8], exposure to cleaning agents [9, 10] including quaternary ammonium compounds, solvents, ozone, formaldehyde, chlorine, bisulfite and SO<sub>2</sub>, acid mist [11–15], diesel exhaust [16], fumigant residues [17], dusts in the textile paper, mineral fiber or construction industries [11, 18] or in mines [19]. It also encompasses at least some cases with potroom [20] and meatwrappers' asthma. Asthma in cold-air athletes may be another example [21, 22]. A paper from Hansson [23] summarized the literature on respiratory effects including asthma due to irritants levels below their occupational or permissible exposure limits (OELs/PELs), confirming that adherence to these limits does not always completely exclude work-related asthma from

occurring in susceptible subjects. Few exposure standards have been set with sensitization as their outcome, as most were originally based upon their irritant properties in normal volunteers and subsequently reduced following clinical or epidemiological studies that continued to show low-dose respiratory effects [23], as well as population-based studies [10, 13, 24–29]. More in general, exposure limits may have been derived from animal experimental evidence and findings from such studies have to be extrapolated to humans. Such extrapolations are usually accompanied by uncertainties. In contrast, others have questioned whether such low concentrations really do cause OA [30, 31]. These different opinions about the pathogenetic role of chronic or recurrent exposure(s) to low concentrations of respiratory irritants may be due to inclusion or exclusion of increased susceptibility in a small group of workers. Since there is limited scientific evidence for this disease entity so far, the task force wishes to encourage research groups to perform more detailed studies in this particular area.

Table 2 summarizes the distinguishing features of the three subcategories of irritant asthma.

**Table 2: Subcategories of irritant-induced OA**

| Subcategories of irritant OA                 | Exposure concentration | Duration of exposure  |
|----------------------------------------------|------------------------|-----------------------|
| Reactive airways dysfunction syndrome (RADS) | Extremely high, » OEL  | < 1 day               |
| Not so sudden onset of irritant OA           | Moderate, OEL range    | > 1 day and <4 months |
| Low dose irritant OA                         | Low, below OEL         | > 4 months            |

### **Related disorders**

Asthma-like symptoms are not well-characterized and are not usually associated with a significant impairment in lung function but may represent an early stage of an increased susceptibility for work-related asthma. They should, therefore, be acknowledged in any preventive measures.

It is obvious that many substances causing work-related asthma also elicit work-related rhinitis and these include mainly high molecular weight particulate aeroallergens, e.g. from natural latex or flour, but also some LMW agents; e.g., acid anhydrides, which do cause occupational rhinitis as well as asthma [32–35]. Work-related rhinitis includes the following nosologic entities:

- work-related rhinitis caused by aeroallergens (allergic work-related rhinitis) or irritants in the workplace [36, 37],
- rhinitis which worsens at work (work-aggravated rhinitis) [38–43].

Allergic work-related rhinitis is frequently associated with NSBHR and often precedes work-related asthma, for which it was found to be a risk factor [32, 34, 36, 44–48], and, therefore, has to be considered when identifying risk groups for medical surveillance and for preventive measures in work-related asthma [38].

Work-related chronic cough is often associated with asthma or COPD, but only as a symptom, and represents a prevalent work-related airway disease that may precede the development of WRA [49, 50].

## References

1. World Health Organization. Prevention of allergy and allergic asthma. Based on the WHO/WAO Meeting on the Prevention of Allergy and allergic Asthma (WHO/NMH/MNC/CRA/03.2). 2002 [cited; Available from: [http://whqlibdoc.who.int/hq/2003/WHO\\_NMH\\_MNC\\_CRA\\_03.2.pdf](http://whqlibdoc.who.int/hq/2003/WHO_NMH_MNC_CRA_03.2.pdf)
2. Johansson SG, Bieber T, Dahl R, Friedmann PS, Lanier BQ, Lockey RF, Motala C, Ortega Martell JA, Platts-Mills TA, Ring J, Thien F, Van Cauwenberge P, Williams HC. Revised nomenclature for allergy for global use: Report of the Nomenclature Review Committee of the World Allergy Organization, October 2003. *The Journal of allergy and clinical immunology* 2004; 113(5): 832-836.
3. Johansson SG, Hourihane JO, Bousquet J, Bruijnzeel-Koomen C, Dreborg S, Haahtela T, Kowalski ML, Mygind N, Ring J, van Cauwenberge P, van Hage-Hamsten M, Wuthrich B. A revised nomenclature for allergy. An EAACI position statement from the EAACI nomenclature task force. *Allergy* 2001; 56(9): 813-824.
4. Baur X, Sigsgaard T, Aasen T, *et al.* Overview of the guidelines management of work-related asthma. *Eur Respir J* 2012; 39; xx–xx.
5. Burge S. Does non-specific irritant exposure matter? *Eur Resp J*, in press 2010.
6. Burge SP, Moore VC, Robertson AS. Low-dose irritant induced occupational asthma. submitted.
7. Cormier Y, Coll B, Laviolette M, Boulet LP. Reactive airways dysfunction syndrome (RADS) following exposure to toxic gases of a swine confinement building. *Eur Respir J* 1996; 9(5): 1090-1091.

8. Dosman JA, Lawson JA, Kirychuk SP, Cornier Y, Biem J, Koehncke N. Occupational asthma in newly employed workers in intensive swine confinement facilities. *Eur Respir J* 2004; 24: 698-702.
9. Kogevinas M, Anto JM, Soriano JB, *et al.* The risk of asthma attributable to occupational exposures. A population-based study in Spain. Spanish Group of the European Asthma Study. *Am J Respir Crit Care Med* 1996; 154: 137-143.
10. Reinisch F, Harrison RJ, Cussler S, Athanasoulis M, Balmes J, Blanc P, Cone J. Physician reports of work-related asthma in California, 1993-1996. *Am J Ind Med* 2001; 39(1): 72-83.
11. Toren K, Jarvholm B, Brisman J, *et al.* Adult-onset asthma and occupational exposures. *Scand J Work Environ Health* 1999; 25: 430-435.
12. Gautrin D, Bernstein IL, Brooks SM, Henneberger PK. Reactive airways dysfunction syndrome and irritant-induced asthma. In: Bernstein IL, Chan-Yeung M, Malo JL, Bernstein DI, eds. *Asthma in the workplace*. Taylor & Francis Group, New York, London, 2006; pp. 581-629.
13. Kipen HM, Blume R, Hutt D. Asthma experience in an occupational and environmental medicine clinic. Low-dose reactive airways dysfunction syndrome. *J Occup Med* 1994; 36(10): 1133-1137.
14. Liss GM, Tarlo SM, Doherty J, Purdham J, Greene J, McCaskell L, Kerr M. Physician diagnosed asthma, respiratory symptoms, and associations with workplace tasks among radiographers in Ontario, Canada. *Occup Environ Med* 2003; 60(4): 254-261.
15. Smedley J, Coggon D. Health surveillance for hospital employees exposed to respiratory sensitizers. *Occup Med (Lond)* 1996; 46(1): 33-36.
16. Adewole F, Moore VC, Robertson AS, Burge PS. Diesel exhaust causing low-dose irritant asthma with latency? *Occup Med (Lond)* 2009; 59(6): 424-427.
17. Baur X, Preisser A, Heblich F. Data Bank: Patients intoxicated with fumigants (recent cases). 2008 [cited; Available from: <http://www.port-health.org/html-tox/dabae.html>
18. Toren K, Balder B, Brisman J, *et al.* The risk of asthma in relation to occupational exposures: a case-control study from a Swedish city. *Eur Respir J* 1999; 13: 496-501.
19. Kogevinas M, Anto JM, Sunyer J, *et al.* Occupational asthma in Europe and other industrialised areas: a population-based study. European Community Respiratory Health Survey Study Group. *Lancet* 1999; 353: 1750-1754.
20. Kongerud J, Gronnesby JK, Magnus P. Respiratory symptoms and lung function of aluminum potroom workers. *Scand J Work Environ Health* 1990; 16(4): 270-277.

21. Carlsen KH, Anderson SD, Bjermer L, Bonini S, Brusasco V, Canonica W, Cummiskey J, Delgado L, Del Giacco SR, Drobic F, Haahtela T, Larsson K, Palange P, Popov F, van Cauwenberge P. Exercise-induced asthma, respiratory and allergic disorders in elite athletes: epidemiology, mechanisms and diagnosis: Part I of the report from the Joint Task Force of the European Respiratory Society (ERS) and the European Academy of Allergy and Clinical Immunology (EAACI) in cooperation with GA2LEN. *Allergy* 2008; 63: 387-403.
22. Karjalainen EM, Laitinen A, Sue-Chu M, Altraja A, Bjermer L, Laitinen LA. Evidence of airway inflammation and remodeling in ski athletes with and without bronchial hyperresponsiveness to methacholine. *Am J Respir Crit Care Med* 2000; 161(6): 2086-2091.
23. Hansson SO. Critical effects and exposure limits. *Risk Anal* 1997; 17(2): 227-236.
24. Gannon PF, Burge PS. The SHIELD scheme in the West Midlands Region, United Kingdom. Midland Thoracic Society Research Group. *Br J Ind Med* 1993; 50: 791-796.
25. Bakke PS, Baste V, Hanoa R, Gulsvik A. Prevalence of obstructive lung disease in a general population: relation to occupational title and exposure to some airborne agents. *Thorax* 1991; 46(12): 863-870.
26. Balmes JR. Occupational airways diseases from chronic low-level exposures to irritants. *Clin Chest Med* 2002; 23(4): 727-735, vi.
27. Brooks SM, Hammad Y, Richards I, Giovenco-Barbas J, Jenkins K. The spectrum of irritant-induced asthma: sudden and not-so-sudden onset and the role of allergy. *Chest* 1998; 113(1): 42-49.
28. Viegi G, Prediletto R, Paoletti P, Carrozzi L, Di Pede F, Vellutini M, Di Pede C, Giuntini C, Lebowitz MD. Respiratory effects of occupational exposure in a general population sample in north Italy. *Am Rev Respir Dis* 1991; 143(3): 510-515.
29. Xu X, Christiani DC, Dockery DW, Wang L. Exposure-response relationships between occupational exposures and chronic respiratory illness: a community-based study. *Am Rev Respir Dis* 1992; 146(2): 413-418.
30. Vandeplass O, Malo J-L. Definitions and types of work-related asthma: a nosological approach. *Eur Respir J* 2003; 21: 706-712.
31. Bardana EJ, Jr. Reactive airways dysfunction syndrome (RADS): guidelines for diagnosis and treatment and insight into likely prognosis. *Ann Allergy Asthma Immunol* 1999; 83(6 Pt 2): 583-586.
32. Karjalainen A, Martikainen R, Klaukka T, *et al.* Risk of asthma among Finnish patients with occupational rhinitis. *Chest* 2003; 123: 283-288.

33. Baur X. [Respiratory tract diseases caused by chemically irritating or toxic pollutants at the work site]. *Pneumologie* 1995; 49(5): 306-311.
34. Grammer LC, Ditto AM, Tripathi A, Harris KE. Prevalence and onset of rhinitis and conjunctivitis in subjects with occupational asthma caused by trimellitic anhydride (TMA). *J Occup Environ Med* 2002; 44(12): 1179-1181.
35. Grammer LC, Harris KE, Yarnold PR. Effect of respiratory protective devices on development of antibody and occupational asthma to an acid anhydride. *Chest* 2002; 121(4): 1317-1322.
36. Gautrin D, Desrosiers M, Castano R. Occupational rhinitis. *Curr Opin Allergy Clin Immunol* 2006; 6(2): 77-84.
37. Malo JL. Future advances in work-related asthma and the impact on occupational health. *Occup Med (Lond)* 2005; 55(8): 606-611.
38. Moscato G, Vandenplas O, Gerth Van Wijk R, *et al.* Occupational rhinitis. *Allergy* 2008; 63: 969-980.
39. Bousquet J, Neukirch F, Bousquet PJ, Gehano P, Klossek JM, Le Gal M, Allaf B. Severity and impairment of allergic rhinitis in patients consulting in primary care. *The Journal of allergy and clinical immunology* 2006; 117(1): 158-162.
40. Eisner MD, Yelin EH, Katz PP, Lactao G, Iribarren C, Blanc PD. Risk factors for work disability in severe adult asthma. *Am J Med* 2006; 119(10): 884-891.
41. Henneberger PK, Derk SJ, Sama SR, Boylstein RJ, Hoffman CD, Preusse PA, Rosiello RA, Milton DK. The frequency of workplace exacerbation among health maintenance organisation members with asthma. *Occup Environ Med* 2006; 63(8): 551-557.
42. Lamb CE, Ratner PH, Johnson CE, Ambegaonkar AJ, Joshi AV, Day D, Sampson N, Eng B. Economic impact of workplace productivity losses due to allergic rhinitis compared with select medical conditions in the United States from an employer perspective. *Curr Med Res Opin* 2006; 22(6): 1203-1210.
43. Castano R, Theriault G. Defining and classifying occupational rhinitis. *J Laryngol Otol* 2006; 120(10): 812-817.
44. Cortona G, Pisati G, Dellabianca A, *et al.* Allergopatie professionali respiratorie: l'esperienza delle Unità Operative Ospedaliere di Medicina del Lavoro in Lombardia dal 1990 al 1998 [Respiratory occupational allergies: the experience of the Hospital Operative Unit of Occupational Medicine in Lombardy from 1990 to 1998]. *G Ital Med Lav Ergon* 2001; 23: 64-70.

45. Cullinan P, Cook A, Gordon S, *et al.* Allergen exposure, atopy and smoking as determinants of allergy to rats in a cohort of laboratory employees. *Eur Respir J* 1999; 13: 1139–1143.
46. Gautrin D., Ghezzi H., Infante-Rivard C., *et al.*: Natural history of sensitization, symptoms and occupational diseases in apprentices exposed to laboratory animals.: *Eur Respir J* 2001; 17: 904–908.
47. Gautrin D, Infante-Rivard C, Ghezzi H, *et al.* Incidence and host determinants of probable occupational asthma in apprentices exposed to laboratory animals. *Am J Respir Crit Care Med* 2001; 163: 899–904.
48. Malo JL, Lemiere C, Desjardins A, Cartier A. Prevalence and intensity of rhinoconjunctivitis in subjects with occupational asthma. *Eur Respir J* 1997; 10(7): 1513-1515.
49. Groneberg DA, Nowak D, Wussow A, Fischer A. Chronic cough due to occupational factors. *J Occup Med Toxicol* 2006; 1: 3.
50. Tarlo SM. Cough: occupational and environmental considerations: ACCP evidence-based clinical practice guidelines. *Chest* 2006; 129(1 Suppl): 186S-196S.
